# Supplementary material for: Genetic diversity of dog breeds: between‐breed diversity, breed assignation and conservation approaches
Source: Wiley journal article supplement (doi:10.1111/j.1365-2052.2008.01843.x), 2009-02-16
Supplement: AGE_1843_sm_TableS1.pdf [file AGE_1843_sm_TableS1.pdf]

**Table S1** Analyses of  $F_{ST}$  values and  $Da$  distances of the 61 dog breeds and 14 wolves compared in pairs ( $Da$  values are in italic above the diagonal and  $F_{ST}$  values are below the diagonal).

|                  | ARI  | ASD         | AST         | BAF         | BAR         | BEA         | BEC <sub>o</sub> | BEN         | BLD         | BLF         | BMD         | BOC <sub>o</sub> | BOX         | BRP         | BRZ         | BSD         | BSG         | BUT         | CAT         | CKC         | COT         | CSP         | CUR         | CWD         | DAL         | DBM         | DOA         | DOB         | EPB         | ESE         | GBG         |
|------------------|------|-------------|-------------|-------------|-------------|-------------|------------------|-------------|-------------|-------------|-------------|------------------|-------------|-------------|-------------|-------------|-------------|-------------|-------------|-------------|-------------|-------------|-------------|-------------|-------------|-------------|-------------|-------------|-------------|-------------|-------------|
| ARI              |      | <i>0,20</i> | <i>0,35</i> | <i>0,22</i> | <i>0,25</i> | <i>0,22</i> | <i>0,42</i>      | <i>0,22</i> | <i>0,36</i> | <i>0,34</i> | <i>0,44</i> | <i>0,29</i>      | <i>0,43</i> | <i>0,24</i> | <i>0,37</i> | <i>0,25</i> | <i>0,39</i> | <i>0,44</i> | <i>0,32</i> | <i>0,37</i> | <i>0,24</i> | <i>0,30</i> | <i>0,21</i> | <i>0,39</i> | <i>0,32</i> | <i>0,46</i> | <i>0,35</i> | <i>0,45</i> | <i>0,30</i> | <i>0,32</i> | <i>0,13</i> |
| ASD              | 0,10 |             | <i>0,31</i> | <i>0,20</i> | <i>0,21</i> | <i>0,23</i> | <i>0,36</i>      | <i>0,24</i> | <i>0,35</i> | <i>0,30</i> | <i>0,37</i> | <i>0,29</i>      | <i>0,42</i> | <i>0,25</i> | <i>0,35</i> | <i>0,25</i> | <i>0,35</i> | <i>0,43</i> | <i>0,31</i> | <i>0,34</i> | <i>0,21</i> | <i>0,28</i> | <i>0,20</i> | <i>0,37</i> | <i>0,32</i> | <i>0,44</i> | <i>0,33</i> | <i>0,39</i> | <i>0,27</i> | <i>0,29</i> | <i>0,21</i> |
| AST              | 0,22 | 0,22        |             | <i>0,37</i> | <i>0,33</i> | <i>0,32</i> | <i>0,42</i>      | <i>0,36</i> | <i>0,34</i> | <i>0,30</i> | <i>0,44</i> | <i>0,31</i>      | <i>0,48</i> | <i>0,35</i> | <i>0,48</i> | <i>0,38</i> | <i>0,47</i> | <i>0,39</i> | <i>0,36</i> | <i>0,44</i> | <i>0,29</i> | <i>0,40</i> | <i>0,29</i> | <i>0,42</i> | <i>0,45</i> | <i>0,55</i> | <i>0,35</i> | <i>0,40</i> | <i>0,41</i> | <i>0,40</i> | <i>0,32</i> |
| BAF              | 0,10 | 0,10        | 0,24        |             | <i>0,24</i> | <i>0,23</i> | <i>0,39</i>      | <i>0,29</i> | <i>0,41</i> | <i>0,36</i> | <i>0,45</i> | <i>0,30</i>      | <i>0,44</i> | <i>0,27</i> | <i>0,39</i> | <i>0,27</i> | <i>0,37</i> | <i>0,50</i> | <i>0,27</i> | <i>0,35</i> | <i>0,21</i> | <i>0,29</i> | <i>0,16</i> | <i>0,39</i> | <i>0,30</i> | <i>0,45</i> | <i>0,40</i> | <i>0,41</i> | <i>0,29</i> | <i>0,28</i> | <i>0,19</i> |
| BAR              | 0,11 | 0,10        | 0,20        | 0,10        |             | <i>0,23</i> | <i>0,32</i>      | <i>0,29</i> | <i>0,34</i> | <i>0,29</i> | <i>0,41</i> | <i>0,32</i>      | <i>0,40</i> | <i>0,23</i> | <i>0,39</i> | <i>0,25</i> | <i>0,29</i> | <i>0,44</i> | <i>0,28</i> | <i>0,34</i> | <i>0,18</i> | <i>0,28</i> | <i>0,17</i> | <i>0,30</i> | <i>0,29</i> | <i>0,41</i> | <i>0,33</i> | <i>0,33</i> | <i>0,23</i> | <i>0,23</i> | <i>0,19</i> |
| BEA              | 0,11 | 0,13        | 0,20        | 0,13        | 0,12        |             | <i>0,38</i>      | <i>0,30</i> | <i>0,37</i> | <i>0,34</i> | <i>0,39</i> | <i>0,31</i>      | <i>0,48</i> | <i>0,28</i> | <i>0,37</i> | <i>0,25</i> | <i>0,40</i> | <i>0,47</i> | <i>0,33</i> | <i>0,34</i> | <i>0,24</i> | <i>0,30</i> | <i>0,22</i> | <i>0,38</i> | <i>0,28</i> | <i>0,45</i> | <i>0,37</i> | <i>0,42</i> | <i>0,30</i> | <i>0,36</i> | <i>0,20</i> |
| BEC <sub>o</sub> | 0,25 | 0,25        | 0,30        | 0,24        | 0,21        | 0,24        |                  | <i>0,42</i> | <i>0,48</i> | <i>0,46</i> | <i>0,48</i> | <i>0,25</i>      | <i>0,53</i> | <i>0,39</i> | <i>0,43</i> | <i>0,42</i> | <i>0,48</i> | <i>0,60</i> | <i>0,37</i> | <i>0,49</i> | <i>0,29</i> | <i>0,40</i> | <i>0,32</i> | <i>0,46</i> | <i>0,39</i> | <i>0,54</i> | <i>0,47</i> | <i>0,49</i> | <i>0,42</i> | <i>0,41</i> | <i>0,37</i> |
| BEN              | 0,12 | 0,14        | 0,24        | 0,17        | 0,17        | 0,16        | 0,25             |             | <i>0,38</i> | <i>0,29</i> | <i>0,39</i> | <i>0,30</i>      | <i>0,43</i> | <i>0,26</i> | <i>0,42</i> | <i>0,28</i> | <i>0,41</i> | <i>0,50</i> | <i>0,35</i> | <i>0,42</i> | <i>0,31</i> | <i>0,33</i> | <i>0,21</i> | <i>0,37</i> | <i>0,37</i> | <i>0,43</i> | <i>0,35</i> | <i>0,34</i> | <i>0,33</i> | <i>0,35</i> | <i>0,26</i> |
| BLD              | 0,22 | 0,26        | 0,26        | 0,27        | 0,23        | 0,24        | 0,34             | 0,26        |             | <i>0,26</i> | <i>0,50</i> | <i>0,44</i>      | <i>0,39</i> | <i>0,40</i> | <i>0,45</i> | <i>0,40</i> | <i>0,46</i> | <i>0,52</i> | <i>0,37</i> | <i>0,51</i> | <i>0,37</i> | <i>0,41</i> | <i>0,31</i> | <i>0,46</i> | <i>0,41</i> | <i>0,37</i> | <i>0,35</i> | <i>0,44</i> | <i>0,38</i> | <i>0,41</i> | <i>0,32</i> |
| BLF              | 0,19 | 0,20        | 0,20        | 0,21        | 0,16        | 0,19        | 0,27             | 0,19        | 0,21        |             | <i>0,43</i> | <i>0,37</i>      | <i>0,41</i> | <i>0,33</i> | <i>0,44</i> | <i>0,33</i> | <i>0,44</i> | <i>0,48</i> | <i>0,39</i> | <i>0,42</i> | <i>0,31</i> | <i>0,39</i> | <i>0,27</i> | <i>0,42</i> | <i>0,38</i> | <i>0,46</i> | <i>0,31</i> | <i>0,39</i> | <i>0,34</i> | <i>0,38</i> | <i>0,31</i> |
| BMD              | 0,24 | 0,24        | 0,31        | 0,28        | 0,24        | 0,24        | 0,31             | 0,25        | 0,34        | 0,28        |             | <i>0,41</i>      | <i>0,56</i> | <i>0,43</i> | <i>0,47</i> | <i>0,47</i> | <i>0,46</i> | <i>0,60</i> | <i>0,45</i> | <i>0,43</i> | <i>0,39</i> | <i>0,38</i> | <i>0,35</i> | <i>0,49</i> | <i>0,41</i> | <i>0,59</i> | <i>0,46</i> | <i>0,49</i> | <i>0,40</i> | <i>0,41</i> | <i>0,39</i> |
| BOC <sub>o</sub> | 0,15 | 0,17        | 0,20        | 0,16        | 0,17        | 0,17        | 0,16             | 0,17        | 0,29        | 0,22        | 0,25        |                  | <i>0,46</i> | <i>0,27</i> | <i>0,41</i> | <i>0,29</i> | <i>0,41</i> | <i>0,48</i> | <i>0,27</i> | <i>0,40</i> | <i>0,25</i> | <i>0,37</i> | <i>0,23</i> | <i>0,42</i> | <i>0,37</i> | <i>0,52</i> | <i>0,33</i> | <i>0,41</i> | <i>0,38</i> | <i>0,32</i> | <i>0,27</i> |
| BOX              | 0,27 | 0,31        | 0,36        | 0,28        | 0,26        | 0,31        | 0,39             | 0,31        | 0,32        | 0,32        | 0,39        | 0,31             |             | <i>0,48</i> | <i>0,50</i> | <i>0,44</i> | <i>0,51</i> | <i>0,53</i> | <i>0,45</i> | <i>0,59</i> | <i>0,42</i> | <i>0,51</i> | <i>0,33</i> | <i>0,45</i> | <i>0,42</i> | <i>0,51</i> | <i>0,38</i> | <i>0,46</i> | <i>0,44</i> | <i>0,46</i> | <i>0,39</i> |
| BRP              | 0,11 | 0,12        | 0,24        | 0,14        | 0,13        | 0,15        | 0,25             | 0,16        | 0,26        | 0,20        | 0,27        | 0,16             | 0,31        |             | <i>0,40</i> | <i>0,29</i> | <i>0,37</i> | <i>0,47</i> | <i>0,33</i> | <i>0,32</i> | <i>0,24</i> | <i>0,34</i> | <i>0,23</i> | <i>0,37</i> | <i>0,34</i> | <i>0,51</i> | <i>0,34</i> | <i>0,42</i> | <i>0,32</i> | <i>0,34</i> | <i>0,23</i> |
| BRZ              | 0,19 | 0,21        | 0,30        | 0,20        | 0,20        | 0,21        | 0,26             | 0,23        | 0,29        | 0,25        | 0,29        | 0,23             | 0,33        | 0,21        |             | <i>0,40</i> | <i>0,46</i> | <i>0,63</i> | <i>0,37</i> | <i>0,44</i> | <i>0,35</i> | <i>0,43</i> | <i>0,34</i> | <i>0,50</i> | <i>0,42</i> | <i>0,56</i> | <i>0,49</i> | <i>0,54</i> | <i>0,42</i> | <i>0,41</i> | <i>0,32</i> |
| BSD              | 0,12 | 0,13        | 0,22        | 0,13        | 0,11        | 0,12        | 0,25             | 0,16        | 0,24        | 0,19        | 0,26        | 0,16             | 0,26        | 0,15        | 0,20        |             | <i>0,39</i> | <i>0,52</i> | <i>0,33</i> | <i>0,37</i> | <i>0,23</i> | <i>0,31</i> | <i>0,21</i> | <i>0,37</i> | <i>0,34</i> | <i>0,47</i> | <i>0,37</i> | <i>0,40</i> | <i>0,29</i> | <i>0,33</i> | <i>0,24</i> |
| BSG              | 0,21 | 0,21        | 0,32        | 0,19        | 0,15        | 0,22        | 0,31             | 0,24        | 0,33        | 0,28        | 0,31        | 0,25             | 0,35        | 0,22        | 0,27        | 0,21        |             | <i>0,60</i> | <i>0,33</i> | <i>0,40</i> | <i>0,35</i> | <i>0,38</i> | <i>0,31</i> | <i>0,39</i> | <i>0,36</i> | <i>0,51</i> | <i>0,48</i> | <i>0,49</i> | <i>0,33</i> | <i>0,33</i> | <i>0,32</i> |
| BUT              | 0,31 | 0,33        | 0,34        | 0,32        | 0,30        | 0,34        | 0,46             | 0,38        | 0,42        | 0,37        | 0,45        | 0,37             | 0,48        | 0,35        | 0,43        | 0,34        | 0,42        |             | <i>0,52</i> | <i>0,60</i> | <i>0,43</i> | <i>0,56</i> | <i>0,43</i> | <i>0,58</i> | <i>0,46</i> | <i>0,58</i> | <i>0,38</i> | <i>0,56</i> | <i>0,52</i> | <i>0,48</i> | <i>0,45</i> |
| CAT              | 0,19 | 0,18        | 0,26        | 0,16        | 0,15        | 0,20        | 0,25             | 0,21        | 0,27        | 0,26        | 0,29        | 0,15             | 0,34        | 0,20        | 0,22        | 0,19        | 0,21        | 0,41        |             | <i>0,37</i> | <i>0,24</i> | <i>0,34</i> | <i>0,22</i> | <i>0,45</i> | <i>0,35</i> | <i>0,52</i> | <i>0,39</i> | <i>0,43</i> | <i>0,35</i> | <i>0,30</i> | <i>0,25</i> |
| CKC              | 0,24 | 0,25        | 0,34        | 0,23        | 0,25        | 0,24        | 0,36             | 0,29        | 0,38        | 0,31        | 0,33        | 0,30             | 0,44        | 0,22        | 0,32        | 0,24        | 0,30        | 0,49        | 0,29        |             | <i>0,36</i> | <i>0,36</i> | <i>0,32</i> | <i>0,49</i> | <i>0,36</i> | <i>0,54</i> | <i>0,52</i> | <i>0,52</i> | <i>0,41</i> | <i>0,43</i> | <i>0,35</i> |
| COT              | 0,11 | 0,11        | 0,19        | 0,10        | 0,08        | 0,12        | 0,18             | 0,16        | 0,23        | 0,17        | 0,24        | 0,13             | 0,27        | 0,12        | 0,18        | 0,10        | 0,18        | 0,29        | 0,13        | 0,24        |             | <i>0,25</i> | <i>0,15</i> | <i>0,33</i> | <i>0,28</i> | <i>0,44</i> | <i>0,31</i> | <i>0,37</i> | <i>0,25</i> | <i>0,25</i> | <i>0,22</i> |
| CSP              | 0,14 | 0,14        | 0,25        | 0,15        | 0,14        | 0,15        | 0,26             | 0,18        | 0,27        | 0,22        | 0,23        | 0,20             | 0,32        | 0,16        | 0,22        | 0,15        | 0,21        | 0,37        | 0,20        | 0,22        | 0,12        |             | <i>0,28</i> | <i>0,45</i> | <i>0,36</i> | <i>0,58</i> | <i>0,41</i> | <i>0,38</i> | <i>0,33</i> | <i>0,32</i> | <i>0,32</i> |
| CUR              | 0,08 | 0,10        | 0,18        | 0,07        | 0,07        | 0,10        | 0,18             | 0,11        | 0,18        | 0,14        | 0,20        | 0,10             | 0,21        | 0,11        | 0,16        | 0,09        | 0,16        | 0,30        | 0,11        | 0,21        | 0,07        | 0,13        |             | <i>0,29</i> | <i>0,26</i> | <i>0,42</i> | <i>0,28</i> | <i>0,35</i> | <i>0,19</i> | <i>0,23</i> | <i>0,16</i> |
| CWD              | 0,20 | 0,24        | 0,30        | 0,22        | 0,17        | 0,22        | 0,32             | 0,23        | 0,31        | 0,25        | 0,31        | 0,24             | 0,30        | 0,22        | 0,28        | 0,21        | 0,23        | 0,42        | 0,26        | 0,34        | 0,18        | 0,24        | 0,15        |             | <i>0,45</i> | <i>0,43</i> | <i>0,46</i> | <i>0,49</i> | <i>0,40</i> | <i>0,44</i> | <i>0,36</i> |
| DAL              | 0,16 | 0,20        | 0,31        | 0,15        | 0,16        | 0,18        | 0,27             | 0,23        | 0,31        | 0,25        | 0,29        | 0,21             | 0,32        | 0,19        | 0,25        | 0,18        | 0,23        | 0,37        | 0,21        | 0,29        | 0,15        | 0,21        | 0,12        | 0,28        |             | <i>0,45</i> | <i>0,37</i> | <i>0,49</i> | <i>0,32</i> | <i>0,29</i> | <i>0,31</i> |
| DBM              | 0,33 | 0,35        | 0,42        | 0,32        | 0,31        | 0,34        | 0,45             | 0,34        | 0,35        | 0,37        | 0,47        | 0,39             | 0,45        | 0,38        | 0,41        | 0,33        | 0,38        | 0,53        | 0,42        | 0,48        | 0,32        | 0,39        | 0,30        | 0,37        | 0,40        |             | <i>0,53</i> | <i>0,50</i> | <i>0,44</i> | <i>0,56</i> | <i>0,47</i> |
| DOA              | 0,17 | 0,20        | 0,22        | 0,21        | 0,18        | 0,18        | 0,30             | 0,22        | 0,24        | 0,19        | 0,29        | 0,20             | 0,31        | 0,19        | 0,28        | 0,19        | 0,28        | 0,31        | 0,24        | 0,35        | 0,16        | 0,21        | 0,14        | 0,25        | 0,22        | 0,40        |             | <i>0,40</i> | <i>0,39</i> | <i>0,41</i> | <i>0,33</i> |
| DOB              | 0,31 | 0,29        | 0,32        | 0,29        | 0,24        | 0,28        | 0,34             | 0,26        | 0,35        | 0,28        | 0,35        | 0,30             | 0,37        | 0,29        | 0,34        | 0,24        | 0,34        | 0,46        | 0,32        | 0,41        | 0,24        | 0,27        | 0,24        | 0,32        | 0,36        | 0,44        | 0,29        |             | <i>0,43</i> | <i>0,43</i> | <i>0,40</i> |
| EPB              | 0,15 | 0,13        | 0,25        | 0,14        | 0,12        | 0,16        | 0,25             | 0,19        | 0,23        | 0,20        | 0,25        | 0,20             | 0,28        | 0,16        | 0,22        | 0,13        | 0,19        | 0,34        | 0,20        | 0,27        | 0,13        | 0,17        | 0,08        | 0,22        | 0,20        | 0,33        | 0,20        | 0,28        |             | <i>0,25</i> | <i>0,25</i> |
| ESE              | 0,17 | 0,18        | 0,28        | 0,16        | 0,13        | 0,20        | 0,26             | 0,20        | 0,27        | 0,23        | 0,26        | 0,19             | 0,31        | 0,20        | 0,22        | 0,17        | 0,22        | 0,34        | 0,19        | 0,33        | 0,14        | 0,19        | 0,11        | 0,26        | 0,18        | 0,41        | 0,22        | 0,31        | 0,15        |             | <i>0,26</i> |
| GBG              | 0,05 | 0,11        | 0,18        | 0,10        | 0,07        | 0,09        | 0,22             | 0,14        | 0,19        | 0,14        | 0,22        | 0,14             | 0,22        | 0,12        | 0,16        | 0,11        | 0,17        | 0,29        | 0,14        | 0,24        | 0,09        | 0,15        | 0,06        | 0,18        | 0,15        | 0,32        | 0,15        | 0,26        | 0,12        | 0,13        |             |
| GPD              | 0,13 | 0,14        | 0,25        | 0,12        | 0,11        | 0,15        | 0,22             | 0,17        | 0,23        | 0,20        | 0,27        | 0,17             | 0,26        | 0,16        | 0,21        | 0,14        | 0,16        | 0,33        | 0,14        | 0,27        | 0,12        | 0,17        | 0,07        | 0,20        | 0,13        | 0,33        | 0,18        | 0,28        | 0,14        | 0,15        | 0,10        |
| GRD              | 0,16 | 0,17        | 0,24        | 0,18        | 0,17        | 0,15        | 0,24             | 0,16        | 0,24        | 0,21        | 0,23        | 0,16             | 0,27        | 0,17        | 0,23        | 0,14        | 0,23        | 0,38        | 0,20        | 0,27        | 0,15        | 0,19        | 0,12        | 0,24        | 0,20        | 0,35        | 0,20        | 0,28        | 0,19        | 0,22        | 0,14        |
| GRT              | 0,24 | 0,28        | 0,31        | 0,24        | 0,23        | 0,25        | 0,32             | 0,26        | 0,28        | 0,27        | 0,33        | 0,27             | 0,35        | 0,24        | 0,28        | 0,22        | 0,32        | 0,44        | 0,29        | 0,35        | 0,22        | 0,26        | 0,18        | 0,28        | 0,30        | 0,40        | 0,29        | 0,35        | 0,23        | 0,25        | 0,21        |
| GSD              | 0,24 | 0,24        | 0,29        | 0,27        | 0,23        | 0,23        | 0,34             | 0,28        | 0,35        | 0,30        | 0,34        | 0,27             | 0,35        | 0,26        | 0,31        | 0,21        | 0,32        | 0,45        | 0,31        | 0,37        | 0,21        | 0,27        | 0,20        | 0,18        | 0,32        | 0,44        | 0,28        | 0,36        | 0,26        | 0,31        | 0,22        |
| ICD              | 0,13 | 0,13        | 0,19        | 0,15        | 0,10        | 0,12        | 0,21             | 0,15        | 0,18        | 0,12        | 0,23</      |                  |             |             |             |             |             |             |             |             |             |             |             |             |             |             |             |             |             |             |             |

|      | ARI  | ASD  | AST  | BAF  | BAR  | BEA  | BECo | BEN  | BLD  | BLF  | BMD  | BOCo | BOX  | BRP  | BRZ  | BSD  | BSG  | BUT  | CAT  | CKC  | COT  | CSP  | CUR  | CWD  | DAL  | DBM  | DOA  | DOB  | EPB  | ESE  | GBG  |
|------|------|------|------|------|------|------|------|------|------|------|------|------|------|------|------|------|------|------|------|------|------|------|------|------|------|------|------|------|------|------|------|
| NFL  | 0,16 | 0,18 | 0,21 | 0,19 | 0,19 | 0,17 | 0,30 | 0,17 | 0,24 | 0,22 | 0,27 | 0,21 | 0,33 | 0,16 | 0,24 | 0,19 | 0,26 | 0,39 | 0,24 | 0,25 | 0,18 | 0,19 | 0,14 | 0,27 | 0,25 | 0,36 | 0,23 | 0,32 | 0,19 | 0,23 | 0,15 |
| PNT  | 0,19 | 0,18 | 0,31 | 0,16 | 0,12 | 0,18 | 0,25 | 0,22 | 0,30 | 0,26 | 0,29 | 0,20 | 0,33 | 0,18 | 0,23 | 0,19 | 0,09 | 0,41 | 0,14 | 0,25 | 0,15 | 0,19 | 0,12 | 0,22 | 0,17 | 0,37 | 0,25 | 0,32 | 0,19 | 0,18 | 0,15 |
| POO  | 0,12 | 0,15 | 0,24 | 0,13 | 0,09 | 0,13 | 0,21 | 0,17 | 0,21 | 0,19 | 0,24 | 0,15 | 0,26 | 0,13 | 0,18 | 0,10 | 0,17 | 0,34 | 0,17 | 0,25 | 0,10 | 0,13 | 0,07 | 0,17 | 0,15 | 0,34 | 0,17 | 0,25 | 0,11 | 0,12 | 0,09 |
| RGCo | 0,31 | 0,30 | 0,39 | 0,29 | 0,30 | 0,33 | 0,41 | 0,33 | 0,42 | 0,35 | 0,41 | 0,36 | 0,45 | 0,30 | 0,35 | 0,30 | 0,36 | 0,54 | 0,36 | 0,42 | 0,27 | 0,31 | 0,29 | 0,33 | 0,39 | 0,51 | 0,36 | 0,41 | 0,33 | 0,34 | 0,28 |
| ROT  | 0,20 | 0,21 | 0,30 | 0,22 | 0,20 | 0,22 | 0,30 | 0,23 | 0,35 | 0,26 | 0,29 | 0,25 | 0,40 | 0,23 | 0,29 | 0,21 | 0,28 | 0,43 | 0,28 | 0,33 | 0,19 | 0,26 | 0,19 | 0,31 | 0,27 | 0,41 | 0,27 | 0,34 | 0,26 | 0,29 | 0,20 |
| RUT  | 0,09 | 0,09 | 0,16 | 0,10 | 0,08 | 0,10 | 0,19 | 0,14 | 0,18 | 0,13 | 0,21 | 0,12 | 0,24 | 0,11 | 0,17 | 0,10 | 0,16 | 0,27 | 0,13 | 0,22 | 0,07 | 0,13 | 0,06 | 0,18 | 0,15 | 0,30 | 0,12 | 0,20 | 0,13 | 0,14 | 0,06 |
| RWD  | 0,16 | 0,15 | 0,25 | 0,17 | 0,15 | 0,16 | 0,25 | 0,17 | 0,24 | 0,23 | 0,26 | 0,18 | 0,32 | 0,17 | 0,20 | 0,18 | 0,20 | 0,38 | 0,15 | 0,27 | 0,14 | 0,16 | 0,11 | 0,24 | 0,19 | 0,36 | 0,22 | 0,30 | 0,20 | 0,20 | 0,16 |
| SDH  | 0,18 | 0,16 | 0,26 | 0,16 | 0,15 | 0,17 | 0,27 | 0,23 | 0,31 | 0,22 | 0,29 | 0,17 | 0,29 | 0,18 | 0,24 | 0,16 | 0,23 | 0,38 | 0,22 | 0,28 | 0,15 | 0,20 | 0,12 | 0,23 | 0,19 | 0,36 | 0,24 | 0,32 | 0,20 | 0,24 | 0,16 |
| SHI  | 0,17 | 0,18 | 0,29 | 0,17 | 0,17 | 0,19 | 0,24 | 0,21 | 0,32 | 0,27 | 0,28 | 0,17 | 0,35 | 0,17 | 0,24 | 0,19 | 0,20 | 0,39 | 0,19 | 0,27 | 0,18 | 0,19 | 0,13 | 0,24 | 0,23 | 0,42 | 0,26 | 0,34 | 0,19 | 0,20 | 0,18 |
| SHP  | 0,15 | 0,13 | 0,22 | 0,15 | 0,14 | 0,17 | 0,26 | 0,19 | 0,26 | 0,22 | 0,26 | 0,17 | 0,29 | 0,16 | 0,21 | 0,12 | 0,21 | 0,36 | 0,18 | 0,26 | 0,10 | 0,16 | 0,11 | 0,23 | 0,22 | 0,36 | 0,19 | 0,25 | 0,16 | 0,16 | 0,13 |
| SHU  | 0,15 | 0,15 | 0,28 | 0,14 | 0,16 | 0,18 | 0,30 | 0,24 | 0,30 | 0,26 | 0,31 | 0,23 | 0,32 | 0,18 | 0,21 | 0,16 | 0,23 | 0,36 | 0,20 | 0,31 | 0,13 | 0,19 | 0,14 | 0,25 | 0,23 | 0,41 | 0,22 | 0,32 | 0,18 | 0,21 | 0,13 |
| SPI  | 0,09 | 0,10 | 0,20 | 0,11 | 0,10 | 0,12 | 0,22 | 0,16 | 0,24 | 0,19 | 0,26 | 0,16 | 0,28 | 0,12 | 0,19 | 0,11 | 0,19 | 0,30 | 0,18 | 0,25 | 0,08 | 0,13 | 0,07 | 0,20 | 0,15 | 0,34 | 0,15 | 0,28 | 0,14 | 0,16 | 0,09 |
| SSP  | 0,11 | 0,11 | 0,23 | 0,09 | 0,08 | 0,13 | 0,24 | 0,15 | 0,25 | 0,19 | 0,26 | 0,17 | 0,28 | 0,12 | 0,20 | 0,12 | 0,17 | 0,31 | 0,16 | 0,21 | 0,09 | 0,12 | 0,08 | 0,20 | 0,15 | 0,34 | 0,21 | 0,27 | 0,13 | 0,15 | 0,09 |
| SWD  | 0,25 | 0,29 | 0,36 | 0,26 | 0,24 | 0,24 | 0,37 | 0,29 | 0,38 | 0,34 | 0,38 | 0,29 | 0,38 | 0,28 | 0,34 | 0,24 | 0,35 | 0,47 | 0,32 | 0,39 | 0,24 | 0,29 | 0,19 | 0,22 | 0,34 | 0,45 | 0,32 | 0,37 | 0,28 | 0,32 | 0,24 |
| WDH  | 0,12 | 0,12 | 0,22 | 0,12 | 0,11 | 0,15 | 0,25 | 0,17 | 0,23 | 0,21 | 0,22 | 0,16 | 0,24 | 0,14 | 0,20 | 0,12 | 0,19 | 0,32 | 0,19 | 0,25 | 0,11 | 0,16 | 0,07 | 0,22 | 0,16 | 0,34 | 0,18 | 0,29 | 0,13 | 0,17 | 0,11 |
| WEI  | 0,17 | 0,17 | 0,25 | 0,16 | 0,14 | 0,17 | 0,24 | 0,19 | 0,27 | 0,24 | 0,25 | 0,18 | 0,32 | 0,19 | 0,23 | 0,18 | 0,19 | 0,39 | 0,14 | 0,26 | 0,12 | 0,16 | 0,12 | 0,20 | 0,20 | 0,38 | 0,24 | 0,31 | 0,16 | 0,20 | 0,14 |
| WHI  | 0,15 | 0,16 | 0,24 | 0,17 | 0,15 | 0,16 | 0,27 | 0,21 | 0,28 | 0,22 | 0,25 | 0,19 | 0,32 | 0,15 | 0,20 | 0,15 | 0,24 | 0,39 | 0,20 | 0,27 | 0,13 | 0,18 | 0,13 | 0,25 | 0,21 | 0,38 | 0,21 | 0,30 | 0,20 | 0,21 | 0,13 |
| WHT  | 0,28 | 0,29 | 0,33 | 0,27 | 0,23 | 0,29 | 0,35 | 0,30 | 0,35 | 0,31 | 0,36 | 0,27 | 0,39 | 0,26 | 0,29 | 0,26 | 0,26 | 0,50 | 0,16 | 0,33 | 0,23 | 0,26 | 0,20 | 0,33 | 0,33 | 0,47 | 0,34 | 0,39 | 0,28 | 0,30 | 0,23 |
| YOT  | 0,12 | 0,13 | 0,21 | 0,12 | 0,11 | 0,13 | 0,21 | 0,18 | 0,25 | 0,20 | 0,23 | 0,15 | 0,26 | 0,16 | 0,17 | 0,15 | 0,17 | 0,34 | 0,14 | 0,27 | 0,10 | 0,16 | 0,09 | 0,21 | 0,18 | 0,31 | 0,20 | 0,26 | 0,16 | 0,19 | 0,10 |
| Wolf | 0,14 | 0,17 | 0,22 | 0,15 | 0,13 | 0,16 | 0,26 | 0,19 | 0,26 | 0,19 | 0,23 | 0,15 | 0,25 | 0,16 | 0,20 | 0,15 | 0,19 | 0,37 | 0,18 | 0,28 | 0,11 | 0,17 | 0,10 | 0,19 | 0,20 | 0,36 | 0,18 | 0,27 | 0,17 | 0,16 | 0,10 |

|      | GPD  | GRD  | GRT  | GSD  | ICD  | ISE  | KCS  | KOR  | LEO  | LRT  | MOP  | NFL  | PNT  | POO  | RGCo | ROT  | RUT  | RWD  | SDH  | SHI  | SHP  | SHU  | SPI  | SSP  | SWD  | WDH  | WEI  | WHI  | WHT  | YOT  | Wolf |
|------|------|------|------|------|------|------|------|------|------|------|------|------|------|------|------|------|------|------|------|------|------|------|------|------|------|------|------|------|------|------|------|
| ARI  | 0,26 | 0,32 | 0,40 | 0,42 | 0,26 | 0,28 | 0,42 | 0,24 | 0,33 | 0,35 | 0,34 | 0,29 | 0,34 | 0,26 | 0,46 | 0,36 | 0,22 | 0,32 | 0,35 | 0,32 | 0,30 | 0,30 | 0,19 | 0,24 | 0,45 | 0,27 | 0,31 | 0,29 | 0,38 | 0,25 | 0,32 |
| ASD  | 0,26 | 0,30 | 0,43 | 0,35 | 0,22 | 0,27 | 0,38 | 0,20 | 0,31 | 0,31 | 0,38 | 0,29 | 0,32 | 0,27 | 0,39 | 0,33 | 0,19 | 0,29 | 0,29 | 0,33 | 0,27 | 0,28 | 0,19 | 0,23 | 0,45 | 0,22 | 0,29 | 0,28 | 0,40 | 0,22 | 0,37 |
| AST  | 0,40 | 0,43 | 0,43 | 0,42 | 0,31 | 0,36 | 0,47 | 0,38 | 0,35 | 0,41 | 0,49 | 0,31 | 0,47 | 0,39 | 0,51 | 0,44 | 0,30 | 0,41 | 0,41 | 0,46 | 0,38 | 0,42 | 0,32 | 0,38 | 0,53 | 0,34 | 0,38 | 0,37 | 0,41 | 0,34 | 0,42 |
| BAF  | 0,28 | 0,34 | 0,38 | 0,44 | 0,27 | 0,28 | 0,36 | 0,22 | 0,34 | 0,33 | 0,34 | 0,36 | 0,31 | 0,25 | 0,43 | 0,40 | 0,20 | 0,33 | 0,30 | 0,31 | 0,31 | 0,29 | 0,25 | 0,22 | 0,45 | 0,25 | 0,31 | 0,31 | 0,39 | 0,23 | 0,37 |
| BAR  | 0,23 | 0,32 | 0,37 | 0,37 | 0,20 | 0,23 | 0,37 | 0,21 | 0,30 | 0,30 | 0,33 | 0,34 | 0,22 | 0,19 | 0,45 | 0,36 | 0,19 | 0,27 | 0,29 | 0,32 | 0,31 | 0,32 | 0,21 | 0,20 | 0,42 | 0,24 | 0,27 | 0,28 | 0,33 | 0,24 | 0,33 |
| BEA  | 0,28 | 0,29 | 0,39 | 0,38 | 0,25 | 0,30 | 0,38 | 0,25 | 0,37 | 0,40 | 0,34 | 0,31 | 0,33 | 0,25 | 0,47 | 0,38 | 0,21 | 0,31 | 0,30 | 0,33 | 0,36 | 0,33 | 0,23 | 0,27 | 0,40 | 0,28 | 0,30 | 0,31 | 0,42 | 0,26 | 0,37 |
| BECo | 0,33 | 0,37 | 0,44 | 0,48 | 0,32 | 0,35 | 0,54 | 0,38 | 0,38 | 0,36 | 0,44 | 0,43 | 0,39 | 0,34 | 0,58 | 0,46 | 0,34 | 0,39 | 0,42 | 0,40 | 0,47 | 0,50 | 0,36 | 0,39 | 0,58 | 0,42 | 0,35 | 0,43 | 0,47 | 0,37 | 0,52 |
| BEN  | 0,32 | 0,29 | 0,40 | 0,43 | 0,25 | 0,30 | 0,47 | 0,30 | 0,33 | 0,38 | 0,37 | 0,27 | 0,35 | 0,31 | 0,48 | 0,35 | 0,27 | 0,30 | 0,38 | 0,35 | 0,36 | 0,42 | 0,27 | 0,30 | 0,47 | 0,31 | 0,34 | 0,33 | 0,44 | 0,34 | 0,42 |
| BLD  | 0,36 | 0,41 | 0,41 | 0,52 | 0,28 | 0,41 | 0,56 | 0,37 | 0,35 | 0,40 | 0,49 | 0,36 | 0,42 | 0,35 | 0,54 | 0,48 | 0,30 | 0,39 | 0,50 | 0,50 | 0,44 | 0,45 | 0,35 | 0,41 | 0,57 | 0,38 | 0,42 | 0,40 | 0,45 | 0,39 | 0,46 |
| BLF  | 0,37 | 0,35 | 0,42 | 0,48 | 0,25 | 0,38 | 0,47 | 0,34 | 0,35 | 0,33 | 0,44 | 0,34 | 0,40 | 0,34 | 0,47 | 0,38 | 0,25 | 0,40 | 0,38 | 0,49 | 0,40 | 0,45 | 0,36 | 0,35 | 0,55 | 0,38 | 0,41 | 0,32 | 0,42 | 0,35 | 0,38 |
| BMD  | 0,43 | 0,42 | 0,47 | 0,52 | 0,41 | 0,43 | 0,47 | 0,42 | 0,45 | 0,44 | 0,47 | 0,43 | 0,43 | 0,41 | 0,56 | 0,40 | 0,38 | 0,42 | 0,46 | 0,45 | 0,47 | 0,51 | 0,45 | 0,46 | 0,57 | 0,39 | 0,38 | 0,41 | 0,51 | 0,39 | 0,45 |
| BOCo | 0,32 | 0,31 | 0,43 | 0,44 | 0,26 | 0,29 | 0,44 | 0,33 | 0,35 | 0,34 | 0,35 | 0,38 | 0,35 | 0,29 | 0,53 | 0,40 | 0,24 | 0,35 | 0,32 | 0,34 | 0,34 | 0,40 | 0,29 | 0,33 | 0,52 | 0,30 | 0,31 | 0,33 | 0,37 | 0,32 | 0,38 |
| BOX  | 0,42 | 0,44 | 0,50 | 0,47 | 0,29 | 0,40 | 0,58 | 0,41 | 0,39 | 0,42 | 0,51 | 0,48 | 0,48 | 0,44 | 0,60 | 0,53 | 0,39 | 0,45 | 0,45 | 0,52 | 0,47 | 0,48 | 0,44 | 0,48 | 0,52 | 0,39 | 0,49 | 0,46 | 0,50 | 0,43 | 0,44 |
| BRP  | 0,30 | 0,30 | 0,39 | 0,43 | 0,24 | 0,27 | 0,38 | 0,29 | 0,36 | 0,31 | 0,32 | 0,29 | 0,30 | 0,27 | 0,44 | 0,38 | 0,24 | 0,30 | 0,31 | 0,34 | 0,33 | 0,35 | 0,24 | 0,25 | 0,47 | 0,27 | 0,36 | 0,28 | 0,36 | 0,31 | 0,35 |
| BRZ  | 0,37 | 0,44 | 0,45 | 0,49 | 0,36 | 0,38 | 0,55 | 0,37 | 0,43 | 0,46 | 0,40 | 0,42 | 0,40 | 0,38 | 0,58 | 0,47 | 0,35 | 0,37 | 0,43 | 0,42 | 0,43 | 0,36 | 0,35 | 0,40 | 0,56 | 0,37 | 0,40 | 0,34 | 0,43 | 0,35 | 0,45 |
| BSD  | 0,30 | 0,30 | 0,38 | 0,34 | 0,26 | 0,31 | 0,40 | 0,28 | 0,38 | 0,38 | 0,28 | 0,37 | 0,35 | 0,24 | 0,46 | 0,36 | 0,24 | 0,35 | 0,32 | 0,37 | 0,28 | 0,32 | 0,25 | 0,27 | 0,44 | 0,27 | 0,37 | 0,30 | 0,41 | 0,33 | 0,39 |
| BSG  | 0,29 | 0,41 | 0,48 | 0,51 | 0,32 | 0,32 | 0,39 | 0,28 | 0,39 | 0,42 | 0,42 | 0,41 | 0,17 | 0,32 | 0,53 | 0,42 | 0,32 | 0,34 | 0,39 | 0,36 | 0,41 | 0,40 | 0,35 | 0,33 | 0,54 | 0,32 | 0,34 | 0,40 | 0,34 | 0,35 | 0,41 |
| BUT  | 0,47 | 0,54 | 0,57 | 0,62 | 0,39 | 0,45 | 0,58 | 0,46 | 0,56 | 0,53 | 0,65 | 0,48 | 0,57 | 0,50 | 0,73 | 0,52 | 0,41 | 0,55 | 0,52 | 0,57 | 0,52 | 0,50 | 0,41 | 0,45 | 0,63 | 0,45 | 0,55 | 0,52 | 0,61 | 0,50 | 0,56 |
| CAT  | 0,27 | 0,37 | 0,41 | 0,50 | 0,28 | 0,30 | 0,39 | 0,26 | 0,29 | 0,40 | 0,33 | 0,38 | 0,27 | 0,33 | 0,54 | 0,41 | 0,23 | 0,32 | 0,39 | 0,34 | 0,34 | 0,35 | 0,33 | 0,30 | 0,52 | 0,32 | 0,25 | 0,29 | 0,18 | 0,25 | 0,40 |
| CKC  | 0,39 | 0,36 | 0,44 | 0,51 | 0,39 | 0,39 | 0,20 | 0,36 | 0,48 | 0,47 | 0,38 | 0,38 | 0,33 | 0,39 | 0,54 | 0,40 | 0,33 | 0,39 | 0,42 | 0,42 | 0,43 | 0,44 | 0,37 | 0,31 | 0,53 | 0,37 | 0,39 | 0,36 | 0,36 | 0,38 | 0,45 |
| COT  | 0,25 | 0,29 | 0,34 | 0,35 | 0,21 | 0,23 | 0,40 | 0,24 | 0,31 | 0,27 | 0,31 | 0,34 | 0,30 | 0,23 | 0,42 | 0,34 | 0,16 | 0,28 | 0,27 | 0,36 | 0,26 | 0,30 | 0,20 | 0,21 | 0,44 | 0,23 | 0,26 | 0,25 | 0,34 | 0,21 | 0,29 |

|                  | GPD  | GRD  | GRT  | GSD  | ICD  | ISE  | KCS  | KOR  | LEO  | LRT  | MOP  | NFL  | PNT  | POO  | RGC <sub>o</sub> | ROT  | RUT  | RWD  | SDH  | SHI  | SHP  | SHU  | SPI  | SSP  | SWD  | WDH  | WEI  | WHI  | WHT  | YOT  | Wolf |
|------------------|------|------|------|------|------|------|------|------|------|------|------|------|------|------|------------------|------|------|------|------|------|------|------|------|------|------|------|------|------|------|------|------|
| CSP              | 0,33 | 0,37 | 0,43 | 0,48 | 0,30 | 0,29 | 0,41 | 0,26 | 0,40 | 0,38 | 0,34 | 0,37 | 0,35 | 0,28 | 0,47             | 0,47 | 0,27 | 0,30 | 0,38 | 0,36 | 0,35 | 0,40 | 0,27 | 0,24 | 0,49 | 0,31 | 0,33 | 0,35 | 0,37 | 0,32 | 0,42 |
| CUR              | 0,18 | 0,24 | 0,31 | 0,34 | 0,17 | 0,20 | 0,34 | 0,18 | 0,27 | 0,27 | 0,28 | 0,26 | 0,23 | 0,19 | 0,46             | 0,33 | 0,14 | 0,24 | 0,25 | 0,26 | 0,25 | 0,28 | 0,19 | 0,21 | 0,38 | 0,18 | 0,25 | 0,26 | 0,33 | 0,22 | 0,29 |
| CWD              | 0,39 | 0,45 | 0,43 | 0,22 | 0,30 | 0,41 | 0,47 | 0,32 | 0,41 | 0,40 | 0,45 | 0,46 | 0,36 | 0,32 | 0,48             | 0,47 | 0,37 | 0,41 | 0,38 | 0,41 | 0,43 | 0,42 | 0,40 | 0,38 | 0,24 | 0,40 | 0,37 | 0,45 | 0,49 | 0,40 | 0,41 |
| DAL              | 0,28 | 0,32 | 0,39 | 0,50 | 0,30 | 0,35 | 0,42 | 0,27 | 0,41 | 0,35 | 0,39 | 0,40 | 0,30 | 0,26 | 0,55             | 0,40 | 0,28 | 0,34 | 0,35 | 0,40 | 0,38 | 0,41 | 0,29 | 0,31 | 0,53 | 0,32 | 0,35 | 0,32 | 0,43 | 0,32 | 0,42 |
| DBM              | 0,49 | 0,47 | 0,49 | 0,56 | 0,36 | 0,47 | 0,59 | 0,51 | 0,51 | 0,46 | 0,52 | 0,45 | 0,47 | 0,47 | 0,65             | 0,48 | 0,43 | 0,46 | 0,49 | 0,59 | 0,53 | 0,59 | 0,48 | 0,49 | 0,53 | 0,48 | 0,50 | 0,47 | 0,59 | 0,44 | 0,52 |
| DOA              | 0,35 | 0,37 | 0,47 | 0,43 | 0,26 | 0,40 | 0,53 | 0,37 | 0,42 | 0,38 | 0,43 | 0,40 | 0,43 | 0,34 | 0,51             | 0,40 | 0,27 | 0,40 | 0,43 | 0,45 | 0,37 | 0,42 | 0,31 | 0,46 | 0,54 | 0,36 | 0,44 | 0,38 | 0,49 | 0,37 | 0,42 |
| DOB              | 0,44 | 0,40 | 0,50 | 0,53 | 0,35 | 0,38 | 0,58 | 0,45 | 0,48 | 0,42 | 0,47 | 0,47 | 0,44 | 0,38 | 0,53             | 0,49 | 0,32 | 0,42 | 0,48 | 0,50 | 0,38 | 0,48 | 0,40 | 0,43 | 0,55 | 0,44 | 0,46 | 0,42 | 0,51 | 0,42 | 0,46 |
| EPB              | 0,30 | 0,34 | 0,37 | 0,42 | 0,25 | 0,28 | 0,46 | 0,24 | 0,35 | 0,34 | 0,44 | 0,32 | 0,30 | 0,25 | 0,53             | 0,42 | 0,26 | 0,37 | 0,35 | 0,37 | 0,34 | 0,37 | 0,31 | 0,25 | 0,51 | 0,27 | 0,32 | 0,37 | 0,42 | 0,30 | 0,40 |
| ESE              | 0,29 | 0,39 | 0,37 | 0,52 | 0,31 | 0,25 | 0,46 | 0,23 | 0,36 | 0,29 | 0,40 | 0,40 | 0,29 | 0,25 | 0,50             | 0,48 | 0,26 | 0,33 | 0,40 | 0,35 | 0,31 | 0,40 | 0,29 | 0,28 | 0,53 | 0,30 | 0,31 | 0,34 | 0,40 | 0,33 | 0,35 |
| GBG              | 0,23 | 0,30 | 0,37 | 0,40 | 0,22 | 0,23 | 0,39 | 0,20 | 0,28 | 0,31 | 0,34 | 0,29 | 0,27 | 0,22 | 0,44             | 0,37 | 0,17 | 0,31 | 0,32 | 0,36 | 0,31 | 0,28 | 0,21 | 0,22 | 0,47 | 0,24 | 0,29 | 0,26 | 0,38 | 0,23 | 0,29 |
| GPD              |      | 0,33 | 0,41 | 0,42 | 0,24 | 0,23 | 0,38 | 0,21 | 0,30 | 0,31 | 0,37 | 0,32 | 0,22 | 0,26 | 0,47             | 0,41 | 0,22 | 0,27 | 0,33 | 0,33 | 0,36 | 0,33 | 0,21 | 0,21 | 0,46 | 0,23 | 0,25 | 0,32 | 0,37 | 0,27 | 0,34 |
| GRD              | 0,16 |      | 0,41 | 0,49 | 0,27 | 0,33 | 0,46 | 0,32 | 0,35 | 0,40 | 0,40 | 0,33 | 0,34 | 0,30 | 0,51             | 0,38 | 0,24 | 0,34 | 0,35 | 0,39 | 0,35 | 0,41 | 0,29 | 0,35 | 0,54 | 0,35 | 0,32 | 0,33 | 0,41 | 0,38 | 0,40 |
| GRT              | 0,25 | 0,23 |      | 0,53 | 0,37 | 0,38 | 0,51 | 0,36 | 0,42 | 0,45 | 0,42 | 0,33 | 0,41 | 0,33 | 0,61             | 0,51 | 0,37 | 0,48 | 0,41 | 0,44 | 0,39 | 0,45 | 0,40 | 0,38 | 0,56 | 0,34 | 0,44 | 0,44 | 0,50 | 0,42 | 0,49 |
| GSD              | 0,26 | 0,27 | 0,35 |      | 0,34 | 0,46 | 0,50 | 0,36 | 0,46 | 0,43 | 0,50 | 0,51 | 0,47 | 0,40 | 0,51             | 0,48 | 0,36 | 0,44 | 0,35 | 0,45 | 0,42 | 0,40 | 0,39 | 0,45 | 0,37 | 0,37 | 0,42 | 0,42 | 0,57 | 0,40 | 0,50 |
| ICD              | 0,13 | 0,14 | 0,22 | 0,20 |      | 0,26 | 0,44 | 0,21 | 0,29 | 0,28 | 0,36 | 0,26 | 0,28 | 0,24 | 0,44             | 0,37 | 0,18 | 0,29 | 0,30 | 0,30 | 0,31 | 0,31 | 0,25 | 0,26 | 0,42 | 0,24 | 0,30 | 0,27 | 0,35 | 0,25 | 0,34 |
| ISE              | 0,11 | 0,18 | 0,23 | 0,27 | 0,13 |      | 0,41 | 0,24 | 0,33 | 0,33 | 0,36 | 0,29 | 0,26 | 0,25 | 0,48             | 0,45 | 0,28 | 0,30 | 0,35 | 0,35 | 0,36 | 0,37 | 0,28 | 0,21 | 0,44 | 0,26 | 0,31 | 0,31 | 0,38 | 0,30 | 0,33 |
| KCS              | 0,27 | 0,30 | 0,38 | 0,37 | 0,29 | 0,29 |      | 0,36 | 0,52 | 0,47 | 0,47 | 0,44 | 0,34 | 0,42 | 0,57             | 0,44 | 0,39 | 0,44 | 0,46 | 0,50 | 0,47 | 0,47 | 0,39 | 0,35 | 0,52 | 0,39 | 0,45 | 0,41 | 0,35 | 0,40 | 0,47 |
| KOR              | 0,09 | 0,17 | 0,24 | 0,22 | 0,11 | 0,13 | 0,28 |      | 0,28 | 0,34 | 0,39 | 0,33 | 0,23 | 0,22 | 0,43             | 0,42 | 0,21 | 0,28 | 0,34 | 0,30 | 0,34 | 0,27 | 0,23 | 0,23 | 0,41 | 0,25 | 0,26 | 0,33 | 0,36 | 0,26 | 0,40 |
| LEO              | 0,16 | 0,22 | 0,27 | 0,31 | 0,18 | 0,18 | 0,39 | 0,16 |      | 0,39 | 0,48 | 0,37 | 0,36 | 0,34 | 0,53             | 0,39 | 0,31 | 0,36 | 0,40 | 0,40 | 0,45 | 0,41 | 0,32 | 0,34 | 0,59 | 0,33 | 0,27 | 0,36 | 0,38 | 0,36 | 0,41 |
| LRT              | 0,16 | 0,23 | 0,30 | 0,29 | 0,16 | 0,19 | 0,35 | 0,20 | 0,25 |      | 0,45 | 0,37 | 0,32 | 0,33 | 0,47             | 0,46 | 0,29 | 0,35 | 0,40 | 0,40 | 0,39 | 0,43 | 0,33 | 0,34 | 0,52 | 0,39 | 0,37 | 0,38 | 0,46 | 0,32 | 0,40 |
| MOP              | 0,21 | 0,24 | 0,28 | 0,31 | 0,21 | 0,21 | 0,36 | 0,22 | 0,29 | 0,30 |      | 0,42 | 0,35 | 0,33 | 0,51             | 0,39 | 0,33 | 0,34 | 0,34 | 0,34 | 0,36 | 0,44 | 0,37 | 0,37 | 0,51 | 0,35 | 0,41 | 0,33 | 0,42 | 0,39 | 0,44 |
| NFL              | 0,19 | 0,18 | 0,22 | 0,31 | 0,15 | 0,17 | 0,32 | 0,20 | 0,23 | 0,24 | 0,25 |      | 0,36 | 0,31 | 0,47             | 0,42 | 0,30 | 0,39 | 0,37 | 0,39 | 0,38 | 0,41 | 0,32 | 0,31 | 0,53 | 0,30 | 0,36 | 0,40 | 0,42 | 0,33 | 0,41 |
| PNT              | 0,12 | 0,19 | 0,29 | 0,31 | 0,17 | 0,15 | 0,28 | 0,12 | 0,23 | 0,21 | 0,23 | 0,22 |      | 0,26 | 0,51             | 0,42 | 0,27 | 0,29 | 0,35 | 0,30 | 0,36 | 0,39 | 0,30 | 0,26 | 0,48 | 0,32 | 0,28 | 0,33 | 0,28 | 0,31 | 0,36 |
| POO              | 0,11 | 0,14 | 0,20 | 0,23 | 0,11 | 0,12 | 0,28 | 0,11 | 0,18 | 0,20 | 0,18 | 0,16 | 0,14 |      | 0,42             | 0,41 | 0,24 | 0,30 | 0,31 | 0,30 | 0,30 | 0,32 | 0,23 | 0,25 | 0,43 | 0,25 | 0,29 | 0,32 | 0,40 | 0,30 | 0,33 |
| RGC <sub>o</sub> | 0,31 | 0,34 | 0,41 | 0,39 | 0,30 | 0,31 | 0,46 | 0,29 | 0,37 | 0,35 | 0,36 | 0,34 | 0,35 | 0,28 |                  | 0,57 | 0,41 | 0,53 | 0,51 | 0,61 | 0,54 | 0,52 | 0,47 | 0,50 | 0,54 | 0,46 | 0,54 | 0,50 | 0,53 | 0,49 | 0,53 |
| ROT              | 0,23 | 0,23 | 0,34 | 0,33 | 0,23 | 0,25 | 0,37 | 0,25 | 0,27 | 0,30 | 0,26 | 0,27 | 0,27 | 0,22 | 0,41             |      | 0,31 | 0,42 | 0,40 | 0,47 | 0,48 | 0,43 | 0,37 | 0,42 | 0,61 | 0,38 | 0,45 | 0,33 | 0,50 | 0,41 | 0,48 |
| RUT              | 0,10 | 0,11 | 0,20 | 0,19 | 0,08 | 0,12 | 0,25 | 0,09 | 0,17 | 0,16 | 0,18 | 0,16 | 0,13 | 0,11 | 0,26             | 0,17 |      | 0,27 | 0,28 | 0,32 | 0,23 | 0,30 | 0,20 | 0,20 | 0,47 | 0,24 | 0,30 | 0,24 | 0,35 | 0,19 | 0,29 |
| RWD              | 0,13 | 0,18 | 0,29 | 0,27 | 0,15 | 0,16 | 0,32 | 0,13 | 0,21 | 0,22 | 0,20 | 0,21 | 0,15 | 0,15 | 0,35             | 0,24 | 0,13 |      | 0,33 | 0,33 | 0,40 | 0,41 | 0,29 | 0,29 | 0,48 | 0,30 | 0,31 | 0,35 | 0,37 | 0,31 | 0,39 |
| SDH              | 0,17 | 0,18 | 0,27 | 0,23 | 0,16 | 0,16 | 0,32 | 0,18 | 0,25 | 0,24 | 0,19 | 0,22 | 0,20 | 0,17 | 0,34             | 0,25 | 0,13 | 0,18 |      | 0,34 | 0,36 | 0,37 | 0,31 | 0,30 | 0,49 | 0,23 | 0,36 | 0,33 | 0,46 | 0,31 | 0,35 |
| SHI              | 0,17 | 0,21 | 0,28 | 0,30 | 0,17 | 0,16 | 0,34 | 0,16 | 0,23 | 0,25 | 0,21 | 0,22 | 0,17 | 0,16 | 0,38             | 0,28 | 0,15 | 0,18 | 0,20 |      | 0,34 | 0,35 | 0,29 | 0,34 | 0,50 | 0,36 | 0,35 | 0,38 | 0,42 | 0,36 | 0,42 |
| SHP              | 0,17 | 0,14 | 0,21 | 0,23 | 0,15 | 0,16 | 0,29 | 0,16 | 0,24 | 0,21 | 0,22 | 0,18 | 0,19 | 0,12 | 0,33             | 0,27 | 0,09 | 0,19 | 0,18 | 0,19 |      | 0,31 | 0,27 | 0,32 | 0,51 | 0,30 | 0,38 | 0,34 | 0,43 | 0,34 | 0,36 |
| SHU              | 0,17 | 0,21 | 0,27 | 0,27 | 0,16 | 0,19 | 0,33 | 0,14 | 0,25 | 0,24 | 0,27 | 0,24 | 0,22 | 0,15 | 0,32             | 0,27 | 0,13 | 0,22 | 0,21 | 0,21 | 0,15 |      | 0,28 | 0,33 | 0,45 | 0,31 | 0,37 | 0,34 | 0,45 | 0,31 | 0,42 |
| SPI              | 0,11 | 0,15 | 0,22 | 0,23 | 0,13 | 0,15 | 0,26 | 0,10 | 0,19 | 0,19 | 0,21 | 0,17 | 0,17 | 0,10 | 0,31             | 0,21 | 0,09 | 0,16 | 0,16 | 0,16 | 0,12 | 0,13 |      | 0,24 | 0,46 | 0,22 | 0,32 | 0,28 | 0,40 | 0,26 | 0,31 |
| SSP              | 0,09 | 0,17 | 0,22 | 0,25 | 0,12 | 0,09 | 0,25 | 0,11 | 0,19 | 0,18 | 0,20 | 0,16 | 0,13 | 0,11 | 0,30             | 0,23 | 0,08 | 0,15 | 0,14 | 0,16 | 0,13 | 0,15 | 0,12 |      | 0,46 | 0,26 | 0,30 | 0,33 | 0,37 | 0,24 | 0,33 |
| SWD              | 0,25 | 0,31 | 0,36 | 0,30 | 0,24 | 0,24 | 0,39 | 0,24 | 0,36 | 0,33 | 0,33 | 0,33 | 0,31 | 0,24 | 0,41             | 0,40 | 0,24 | 0,30 | 0,31 | 0,31 | 0,29 | 0,29 | 0,25 | 0,24 |      | 0,48 | 0,49 | 0,53 | 0,55 | 0,43 | 0,47 |
| WDH              | 0,12 | 0,17 | 0,19 | 0,24 | 0,13 | 0,13 | 0,27 | 0,14 | 0,20 | 0,22 | 0,21 | 0,16 | 0,19 | 0,11 | 0,32             | 0,21 | 0,11 | 0,17 | 0,13 | 0,21 | 0,14 | 0,16 | 0,11 | 0,13 | 0,27 |      | 0,30 | 0,32 | 0,42 | 0,26 | 0,35 |
| WEI              | 0,13 | 0,17 | 0,28 | 0,26 | 0,17 | 0,17 | 0,31 | 0,13 | 0,17 | 0,22 | 0,24 | 0,21 | 0,15 | 0,15 | 0,35             | 0,28 | 0,14 | 0,16 | 0,21 | 0,19 | 0,18 | 0,21 | 0,17 | 0,14 | 0,30 | 0,18 |      | 0,42 | 0,37 | 0,29 | 0,42 |
| WHI              | 0,18 | 0,18 | 0,28 | 0,25 | 0,14 | 0,16 | 0,31 | 0,18 | 0,23 | 0,24 | 0,21 | 0,22 | 0,21 | 0,16 | 0,33             | 0,20 | 0,12 | 0,18 | 0,16 | 0,22 | 0,16 | 0,20 | 0,15 | 0,17 | 0,32 | 0,16 | 0,23 |      | 0,34 | 0,31 | 0,38 |
| WHT              | 0,25 | 0,24 | 0,36 | 0,40 | 0,22 | 0,25 | 0,36 | 0,24 | 0,30 | 0,33 | 0,32 | 0,30 | 0,20 | 0,25 | 0,40             | 0,37 | 0,22 | 0,24 | 0,31 | 0,28 | 0,25 | 0,30 | 0,27 | 0,24 | 0,40 | 0,27 | 0,26 | 0,26 |      | 0,32 | 0,41 |
| YOT              | 0,13 | 0,16 | 0,24 | 0,23 | 0,12 | 0,12 | 0,29 | 0,13 | 0,19 | 0,19 | 0,21 | 0,19 | 0,15 | 0,14 | 0,29             | 0,23 | 0,08 | 0,16 | 0,15 | 0,18 | 0,14 | 0,15 | 0,13 | 0,11 | 0,24 | 0,12 | 0,14 | 0,16 | 0,21 |      | 0,29 |
| Wolf             | 0,14 | 0,16 | 0,24 | 0,26 | 0,14 | 0,13 | 0,30 | 0,17 | 0,20 | 0,20 | 0,21 | 0,19 | 0,16 | 0,12 | 0,31             | 0,25 | 0,11 | 0,17 | 0,16 | 0,20 | 0,13 | 0,19 | 0,14 | 0,12 | 0,25 | 0,13 | 0,18 | 0,17 | 0,24 | 0,10 |      |
